# Supplementary material
Source: PubMed Central journal article supplement (PMC4826613)
Supplement: NIHMS768514-supplement-01.pdf [file NIHMS768514-supplement-01.pdf]

cells/spleen (G), and T<sub>REG</sub> cells/spleen (H) in all mice. P values for linear regression analyses are shown within each graph.

**Figure 8.** PR deficiency alters splenic APC activation and *ifng* and *esr1* mRNA expression in aged *Nba2* mice. **A**, CD86 expression on splenic APC subsets from female (black) and male (grey) PR<sup>-/-</sup> mice relative to PR<sup>+/+</sup> controls assessed on the same day. Shown are means ± standard error, n = 3 per group. \*, *p* < 0.05 one sample t test. **B**, IFN-γ (*ifng*), T-bet (*tbx21*) and ER-α (*esr1*) gene mRNA levels in freshly frozen splenic leukocytes from 10 mo.-old mice. Shown are means (lines) and individual values (symbols). \*, *p* < 0.05 unpaired t test.

**Supplementary Figure 1.** Glomerular histology. Shown are representative images of Mac-2<sup>+</sup> macrophages within glomeruli (black arrows), and glomerular structural damage as revealed by Jones stain, both 40x. Non-specific staining of renal tubule cells by anti-Mac-2 Ab indicated by white arrows.

**Supplementary Figure 2.** PR protein expression in kidneys from 10 mo.-old female *Nba2*.PR<sup>+/+</sup> mice and uterus control tissues. Binding of rabbit anti-PR polyclonal IgG to sections of freshly frozen uterus from B6 mice (positive control tissue) (**A - C**) and B6.PR<sup>-/-</sup> mice (negative control tissue) (**D**) visualized with either fluorescein-conjugated goat-anti-rabbit IgG (green) (**A**) or biotin-conjugated goat anti-rabbit IgG followed by streptavidin-conjugated to Alexa Fluor® 555 (red) (**B - F**). **E** and **F** are representative images of PR staining in sections from 10 mo.-old *Nba2*.PR<sup>+/+</sup> mice showing high glomerular inflammation scores. \*, glomerulus; #, renal tubule. All sections were counterstained with DAPI (blue) to label nuclei. Insets show rabbit IgG isotype control staining.

**Supplementary Figure 3.** Effects of PR deficiency on spleen mass and proportions of major splenic leukocyte subsets in 10 mo.-old *Nba2* mice. Shown are means (lines) and individual values (symbols) for splenic mass (**A**) and various subsets as a percentage of total splenic leukocytes: B cells

(B220<sup>hi</sup>CD11c<sup>lo</sup>mPDCA1<sup>-</sup>) (**B**), CD4<sup>+</sup> T cells (CD3<sup>+</sup>CD4<sup>+</sup>) (**C**), mDCs (B220<sup>-</sup>CD11c<sup>hi</sup>mPDCA1<sup>-</sup>) (**D**), pDCs (B220<sup>+</sup>CD11c<sup>lo</sup>mPDCA1<sup>+</sup>) (**E**), and macrophages (F4/80<sup>hi</sup>) (**F**). \*, p < 0.05; \*\*, p < 0.01, unpaired t test.

**Supplementary Figure 4.** PR deficiency increases the proportions of splenic T<sub>FH</sub> cells in 10 mo.-old female *Nba2* mice but decreases this variable in age-matched male *Nba2* mice. (**A – F**) Shown are means (lines) and individual values (symbols) for various subsets as expressed as percentages of splenic CD4<sup>+</sup> T cells or their T<sub>FH</sub> and non-T<sub>FH</sub> subsets (as indicated by arrows): T<sub>FH</sub> cells (A), T<sub>FREG</sub> cells (B), T<sub>FH1</sub> cells (C), non-T<sub>FH</sub> CD4<sup>+</sup> T cells (D), T<sub>REG</sub> cells (E) and T<sub>H1</sub> cells (F). \*, p < 0.05, \*\*, p < 0.01, unpaired t test.

**Supplementary Figure 5.** Relationships between serum autoAb levels and T<sub>FH</sub>/non-T<sub>FH</sub> CD4<sup>+</sup> T cell or T<sub>FH</sub>/B cell ratios in spleens of 10 mo.-old *Nba2* mice. Shown are linear regression analyses of serum autoAb levels at 10 mo. (A and B) or serum AUC autoAb levels at 8 mo. (C and D) vs. T<sub>FH</sub>/non-T<sub>FH</sub> CD4<sup>+</sup> T cell ratios (A and C) or T<sub>FH</sub>/B cell ratios (B and D) for all animals. P values for linear regression analyses are shown within each graph.

**Supplementary Figure 6.** Effects of PR deficiency on body mass of *Nba2* mice between 4 and 10 mo. age. Shown are means (lines) and individual values (symbols) for body mass at indicates time points. \*, p < 0.05, unpaired t test.
